# Supplementary material for: TMEM158-mediated TGF-β signaling pathway modulates the sensitivity of TP53-deficient osteosarcoma to USP14 inhibitors
Source: Research Square preprint supplement (doi:10.21203/rs.3.rs-7071793/v1), 2025-08-21

**Supplementary information**

**Table S1 Primers used for qRT-PCR**

| **Gene** | **Primer** | **Sequence** |
| --- | --- | --- |
| TMEM158 (human) | Forward primer | TGTGCTTCGTGCTGTAGTTATC |
| Reverse primer | TCAGTCCAAGGGCTTAAACATC |
| TMEM158 (mouse) | Forward primer | AACATCAGCGTGCAACGACA |
| Reverse primer | AGCCCCAGATGCTCGATGA |
| TGFBR1 (human) | Forward primer | ACGGCGTTACAGTGTTTCTG |
| Reverse primer | GCACATACAAACGGCCTATCTC |
| TGFBR1 (mouse) | Forward primer | TCTGCATTGCACTTATGCTGA |
| Reverse primer | AAAGGGCGATCTAGTGATGGA |
| SMAD2 (human) | Forward primer | CGTCCATCTTGCCATTCACG |
| Reverse primer | CTCAAGCTCATCTAATCGTCCTG |
| SMAD2 (mouse) | Forward primer | AAGCCATCACCACTCAGAATTG |
| Reverse primer | CACTGATCTACCGTATTTGCTGT |


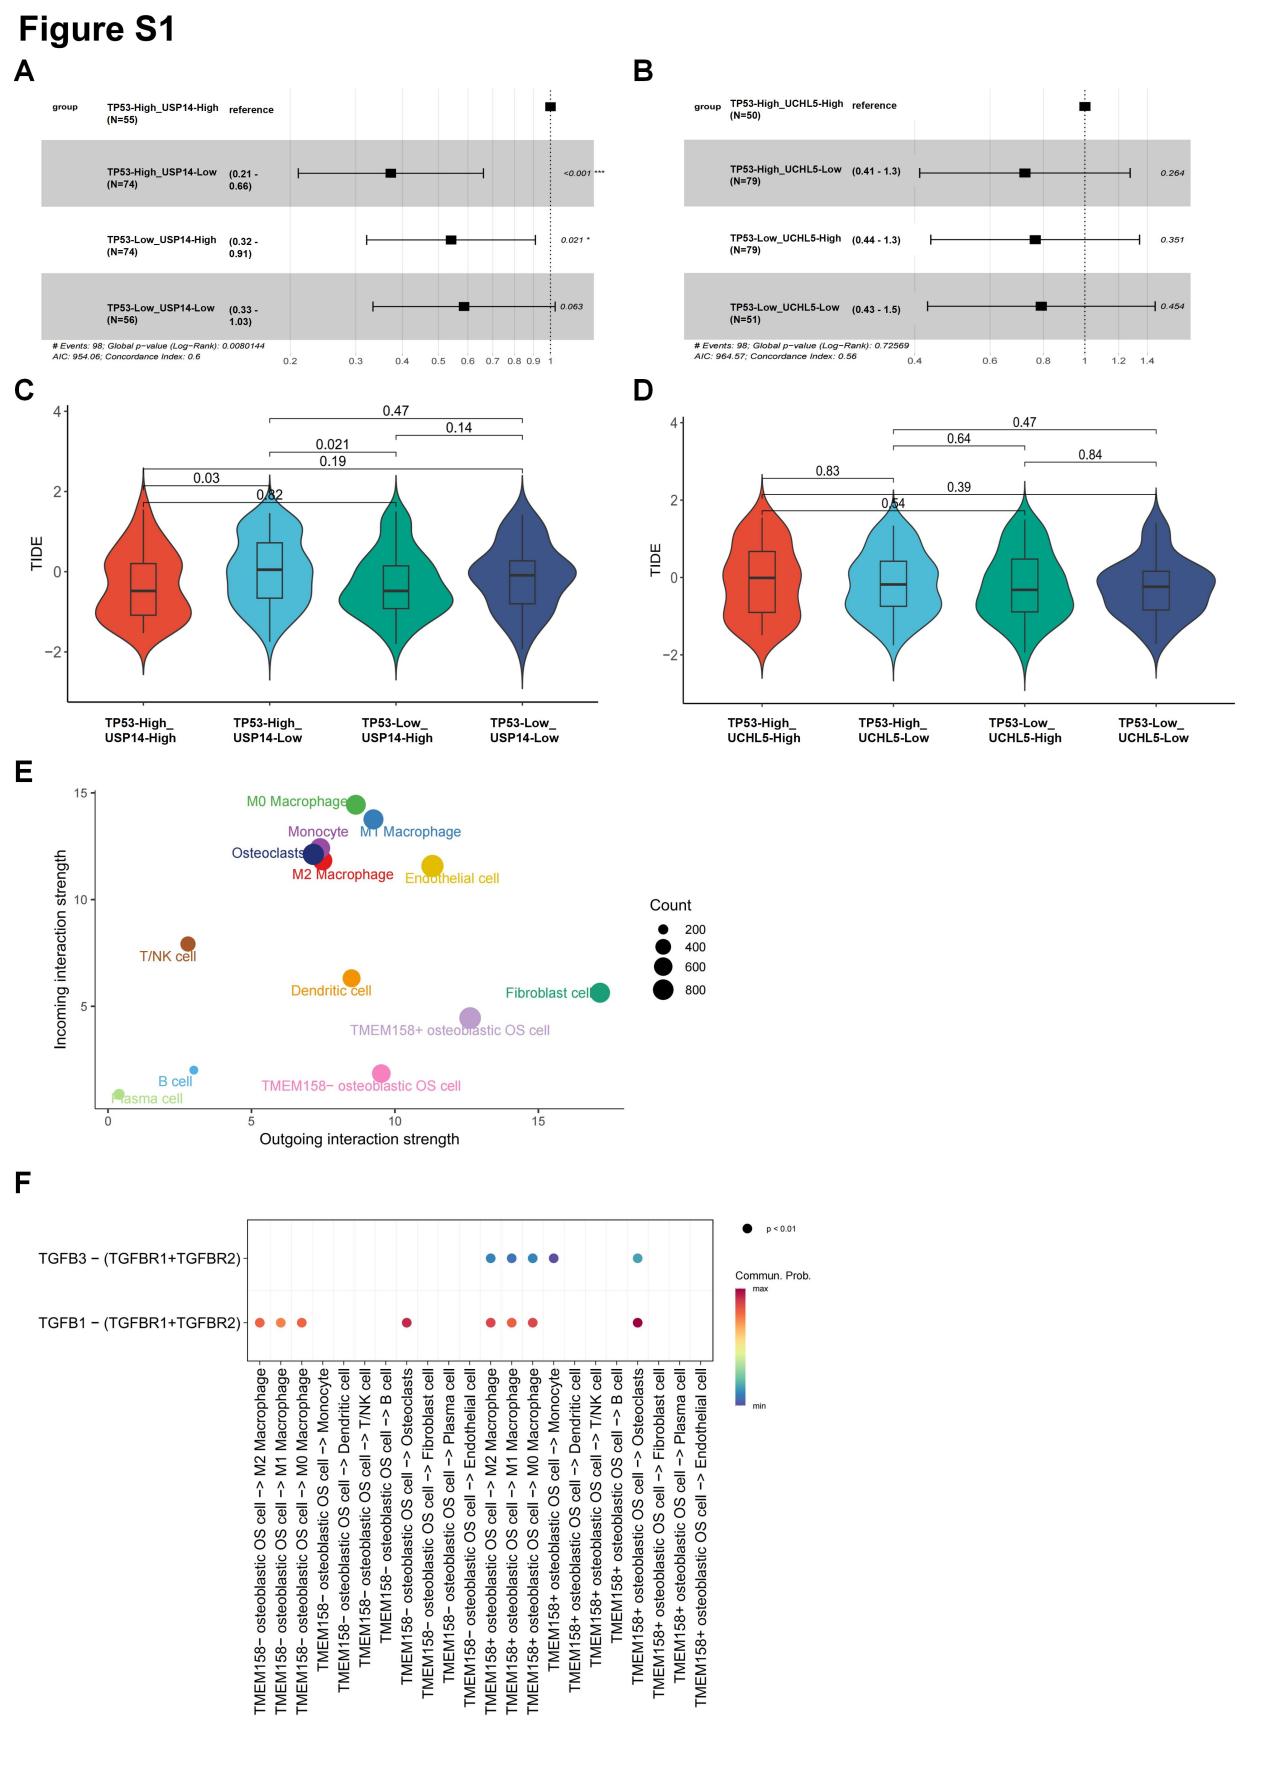

Supplement: Supplementary file 1 [file ea1425b0ecec1927a0ccd243.docx]
